P6264

## Mitral regurgitation and prognosis after non-ST-segment elevation myocardial infarction in very old patients

A. Vera Sainz<sup>1</sup>, P. Diez Villanueva<sup>1</sup>, A. Ariza Sole<sup>2</sup>, F. Formiga<sup>2</sup>, R. Lopez Palop<sup>3</sup>, F. Marin<sup>4</sup>, M. Vidan<sup>5</sup>, M. Martinez Selles<sup>5</sup>, J. Salamanca<sup>1</sup>, A. Sionis<sup>6</sup>, H. Garcia Pardo<sup>7</sup>, H. Bueno<sup>8</sup>, J. Sanchis<sup>9</sup>, E. Abu Assi<sup>10</sup>, F. Alfonso<sup>1</sup>

<sup>1</sup>University Hospital De La Princesa, Madrid, Spain; <sup>2</sup>University Hospital of Bellvitge, Barcelona, Spain; <sup>3</sup>University Hospital San Juan de Alicante, Alicante, Spain; <sup>4</sup>Hospital Universitario Virgen Arrixaca, Murcia, Spain; <sup>5</sup>University Hospital Gregorio Maranon, Madrid, Spain; <sup>6</sup>Hospital de la Santa Creu i Sant Pau, Barcelona, Spain; <sup>7</sup>University Hospital del Rio Hortega, Valladolid, Spain; <sup>8</sup>University Hospital 12 de Octubre, Madrid, Spain; <sup>9</sup>University Hospital Clinic of Valencia, Valencia, Spain; <sup>10</sup>Hospital Alvaro Cunqueiro, Vigo, Spain

On behalf of LONGEVO-SCA registry investigators

**Background:** Mitral regurgitation (MR) after acute coronary syndromes is associated with adverse prognosis. However, the prognostic impact of MR in older patients with Non ST-segment Elevation Myocardial Infarction (NSTEMI) has not been well addressed.

**Methods:** The multicenter LONGEVO-SCA prospective registry included 532 unselected patients with NSTEMI aged  $\geq 80$  years. Echocardiography performed during admission quantified mitral valve parameters in 497 patients, who were classified according to mitral regurgitation (MR) status in two groups: significant (moderate or severe) or no significant MR (absent or mild). We evaluated the impact of MR status on mortality or readmission at 6-months.

**Results:** Mean age was  $84.3 \pm 4.1$  years, 308 (61.9%) were males. A total of 108 patients (21.7%) had significant MR. Compared with patients without

significant MR these patients had lower systolic blood pressure ( $132 \pm 28$  vs  $141 \pm 27$  mmHg), higher heart rate ( $82 \pm 21$  vs  $74 \pm 17$  bpm), worse Killip class ( $\geq II$  49.5% vs 22.5%), lower ejection fraction ( $47 \pm 14\%$  vs  $55 \pm 11\%$ ), higher pulmonary pressure ( $42 \pm 15$  vs  $35 \pm 11$  mmHg), as well as more frequent new onset atrial fibrillation (16.4% vs 7.2%) (all p values=0.001). Patients with significant MR also had higher in-hospital mortality (4.6% vs 1.3%,  $p=0.04$ ) and longer hospital stay (median 8 [5–12] vs 6 [4–10] days,  $p=0.002$ ), and higher mortality/readmission at 6 months (HR 1.54, 95% CI 1.09–2.18). However, after adjusting for potential confounders, this last association was not significant.

**Conclusions:** Significant MR is seen in about one fifth of octogenarians with NSTEMI. Patients with significant MR have a poor prognosis, which is mainly determined by their clinical characteristics.
